# Supplementary material
Source: MDPI journal article supplement (https://www.mdpi.com/2073-4441/12/12/3499)
Supplement: s1 [file s1]

## Supporting Materials

**Table S1.** The classification standards for lake water quality and water function in China (GB3838-2002).

| Water quality classification | Water function                                                                      | DO<br>(mg/L)<br>(≥) | TN<br>(mg/L)<br>(≤) | NH <sub>4</sub> <sup>+</sup> -N<br>(mg/L)<br>(≤) | TP<br>(mg/L)<br>(≤) | COD<br>(mg/L)<br>(≤) | COD <sub>Mn</sub><br>(mg/L)<br>(≤) |
|------------------------------|-------------------------------------------------------------------------------------|---------------------|---------------------|--------------------------------------------------|---------------------|----------------------|------------------------------------|
| Class I                      | Applicable to water sources and state reserves                                      | 7.5                 | 0.2                 | 0.15                                             | 0.01                | 15                   | 2                                  |
| Class II                     | Applicable to centralized sources of drinking water, hydrobiological habitats, etc. | 6                   | 0.5                 | 0.5                                              | 0.025               | 15                   | 4                                  |
| Class III                    | Applicable to centralized sources of drinking water, aquaculture, etc.              | 5                   | 1.0                 | 1.0                                              | 0.05                | 20                   | 6                                  |
| Class IV                     | Applicable to industrial and recreational water                                     | 3                   | 1.5                 | 1.5                                              | 0.1                 | 30                   | 10                                 |
| Class V                      | Applicable to agricultural and landscape water                                      | 2                   | 2.0                 | 2.0                                              | 0.2                 | 40                   | 15                                 |
